Anesthesiology  
83:344-352, 1995  
© 1995 American Society of Anesthesiologists, Inc.  
Lippincott-Raven Publishers

## Visceral Antinociceptive Effects of Spinal Clonidine Combined with Morphine, [D-Pen<sup>2</sup>, D-Pen<sup>5</sup>] Enkephalin, or U50,488H

Y. Harada, M.D.,\* K. Nishioka, M.D.,\* L. M. Kitahata, M.D., Ph.D.,† K. Kishikawa, M.D.,\* J. G. Collins, Ph.D.‡

**Background:** Visceral pain is an important component of many clinical pain states. The perispinal administration of drug combinations rather than a single agent may reduce side effects while maximizing analgesic effectiveness. The purpose of this study was to examine the nature of interactions between an  $\alpha_2$ -adrenergic agonist (clonidine) and a  $\mu$ -opioid agonist (morphine), a  $\delta$ -opioid agonist ([D-Pen<sup>2</sup>, D-Pen<sup>5</sup>] enkephalin [DPDPE]), or a  $\kappa$ -opioid agonist (U50,488H).

**Methods:** Colorectal distension was used to elicit a nociceptive visceromotor response (contraction of abdominal musculature) in rats. The ability of intrathecally administered clonidine alone or in combination with morphine, DPDPE, or U50,488H to alter thresholds for the production of the visceromotor response was examined.

**Results:** Clonidine produced dose-dependent reduction in visceromotor response thresholds and, when combined with morphine or DPDPE, produced a synergistic reduction in the threshold. U50,488H, at the doses tested, showed no synergistic interaction with clonidine.

**Conclusions:** Spinal combinations of  $\alpha_2$ -adrenergic and  $\mu$ - or  $\delta$ - but not  $\kappa$ -opioid agonists may be beneficial in the control of visceral pain. (Key words: Analgesics,  $\alpha_2$ -adrenergic ago-

nists: clonidine. Analgesics, opioid: [D-Pen<sup>2</sup>, D-Pen<sup>5</sup>] enkephalin; morphine; U50,488H. Pain, visceral: colorectal distension.)

DEEP pain associated with the viscera is different from somatic cutaneous pain.<sup>1</sup> Because of its clinical importance, there is a need for a better understanding of the pharmacologic control of visceral pain. So far, however, less attention has been devoted to visceral pain than somatic pain, probably in large part because of the lack of appropriate analgesiometric tests for visceral nociception. Colorectal distension (CRD) was originally characterized by Ness and Gebhart as a reliable and useful model of visceral pain in the awake rat.<sup>2</sup> CRD is a reproducible, minimally invasive, reliable noxious visceral stimulus.<sup>2</sup> In addition, it mimics visceral pain in humans.<sup>3,4</sup> Using the CRD test, investigators have begun to focus on visceral antinociception and mechanisms of visceral pain.<sup>5-9</sup> In these reports, it has been demonstrated that opioid (morphine) and  $\alpha_2$ -adrenergic receptor agonists (e.g., clonidine and ST-91) modulate visceral nociception at the level of the spinal cord.<sup>2,6,7,9</sup>

In somatic pain studies in animals, there is abundant evidence for synergistic-like interactions between spinally administered opioid and  $\alpha_2$ -adrenergic agonists.<sup>10-16</sup> True synergism has been shown by isobolographic analysis.<sup>17-19</sup> Determining optimum drug combinations that, at minimal doses, produce powerful analgesia with less side effects is of great interest for management of pain.<sup>20</sup>

The purpose of this study was to examine by isobolographic analysis the nature of interactions between clonidine and morphine, clonidine and [D-Pen<sup>2</sup>, D-Pen<sup>5</sup>] enkephalin (DPDPE), and clonidine and U50,488H for visceral antinociception with the CRD test. Portions of this study have been reported previously.§||

### Materials and Methods

The protocol of this study was approved by the Yale Animal Care and Use Committee. Experiments were

\* Postdoctoral Associate in Anesthesiology.

† Professor of Anesthesiology.

‡ Associate Professor of Anesthesiology.

Received from the Department of Anesthesiology, Yale University School of Medicine, New Haven, Connecticut. Submitted for publication April 28, 1994. Accepted for publication April 10, 1995. Supported by National Institutes of Health grant NS 09871. Presented in part at the annual meetings of the American Society of Anesthesiologists, New Orleans, Louisiana, November 1991, and the American Pain Society, New Orleans, Louisiana, November 1991.

Address reprint requests to Dr. Collins: Department of Anesthesiology, Yale University School of Medicine, 333 Cedar Street, New Haven, Connecticut 06510.

§ Harada Y, Nishioka K, Kitahata LM, Collins JG: Significant synergism between intrathecal morphine and clonidine for visceral nociception (abstract). ANESTHESIOLOGY 75:A660, 1991.

|| Harada Y, Nishioka K, Kitahata LM, Collins JG: Contrasting analgesic action of the intrathecal kappa agonist (U50,488H) in visceral pain processing as compared to morphine and clonidine (abstract). ANESTHESIOLOGY 75:A663, 1991.

conducted on adult male Sprague  
280-360 g. An in-depth descrip  
tained in the accompanying ar  
anesthesia an intrathecal cathet  
lumbar enlargement of the spina  
method described previously.<sup>22</sup>

### Antinociceptive Test

CRD evokes reliable cardiov  
(visceromotor) responses that  
These responses are useful mea  
ception.<sup>2</sup> Inhibition of the res  
valid and reliable indication o  
cacy.<sup>2</sup> In this study, we used the  
(a contraction of abdominal mu  
of visceral nociception. CRD w  
sure-controlled air inflation of a  
(5 cm long). Visceromotor resp  
a 1.5-cm-long detection alloca  
distension balloon and inated  
sensitivity to changes in intralu  
According to previous report  
tending pressure necessary to e  
response was defined as the visc  
this study, the distending pres  
the onset of a sudden and sus  
detection balloon pressure was  
motor threshold. The increase  
was associated with a visible co  
musculature.

### Experimental Protocol

Testing was done 10-18 day  
(visceromotor threshold) we  
awake rats by the detection bal  
above. (Information about the  
[ED<sub>50</sub>] of morphine, DPDPE, a  
tained from 87 animals, as rep  
nying article.<sup>21</sup> Those 87 anim  
total of 108 animals described i  
seven of 108 rats were used a  
initial experiment but never r  
twice. On the day of an exper  
lightly anesthetized with halotha  
distension and detection balloo  
for 10-20 min. For 20-60 m  
baseline values of visceromot  
peatedly (four to seven times)  
min. The average of the last th

## VISCERAL ANTINOCICEPTIVE EFFECTS OF CLONIDINE

conducted on adult male Sprague-Dawley rats weighing 280–360 g. An in-depth description of methods is contained in the accompanying article.<sup>21</sup> Under general anesthesia an intrathecal catheter was placed near the lumbar enlargement of the spinal cord according to a method described previously.<sup>22</sup>

### Antinociceptive Test

CRD evokes reliable cardiovascular and behavioral (visceromotor) responses that are easily measured. These responses are useful measures of visceral nociception.<sup>2</sup> Inhibition of the responses by a drug is a valid and reliable indication of antinociceptive efficacy.<sup>2</sup> In this study, we used the visceromotor response (a contraction of abdominal musculature) as a measure of visceral nociception. CRD was achieved with pressure-controlled air inflation of a latex distension balloon (5 cm long). Visceromotor response was detected with a 1.5-cm-long detection balloon attached distal to the distension balloon and inflated with 6 ml air to ensure sensitivity to changes in intraluminal pressure.

According to previous reports,<sup>2,5</sup> the minimum distending pressure necessary to evoke a visceromotor response was defined as the visceromotor threshold. In this study, the distending pressure corresponding to the onset of a sudden and sustained increase in the detection balloon pressure was defined as the visceromotor threshold. The increase in detection pressure was associated with a visible contraction of abdominal musculature.

### Experimental Protocol

Testing was done 10–18 days after surgery. All data (visceromotor thresholds) were obtained from 108 awake rats by the detection balloon method described above. (Information about the 50% effective doses [ED<sub>50</sub>] of morphine, DPDPE, and U50,488H was obtained from 87 animals, as reported in the accompanying article.<sup>21</sup> Those 87 animals are included in the total of 108 animals described in this report.) Seventy-seven of 108 rats were used again 3–5 days after the initial experiment but never received the same drug twice. On the day of an experiment, the rats were lightly anesthetized with halothane for insertion of both distension and detection balloons. After balloon insertion, the rats were allowed to recover from anesthesia for 10–20 min. For 20–60 min after full recovery, baseline values of visceromotor thresholds were repeatedly (four to seven times) measured every 5–10 min. The average of the last three values was defined

as a control threshold value. After baseline measurements, drugs were administered intrathecally through the chronically implanted catheter. Postdrug thresholds were measured 5, 10, 15, 20, 30, and 45 min after drug administration. Each postdrug measurement was done only once at each time point.

### Drugs

Clonidine hydrochloride (Sigma Chemical, St. Louis, MO), morphine sulfate (Sigma), DPDPE (Research Biochemicals, Natick, MA), and U50,488H (Sigma) were used as  $\alpha_2$ -adrenergic,  $\mu$ -opioid,  $\delta$ -opioid, and  $\kappa$ -opioid receptor agonists, respectively. Yohimbine hydrochloride (Sigma) and naloxone hydrochloride (Sigma) were used as  $\alpha_2$ -adrenergic and opioid receptor antagonists, respectively. All compounds were dissolved in sterile physiologic saline, and 5 or 10  $\mu$ l solution was administered intrathecally. Drugs were administered slowly (over a period of 30–60 s). The dead space (12  $\mu$ l) of the catheter was cleared by a similarly slow flush of physiologic saline. Clonidine, as with the other agonists in the accompanying study,<sup>21</sup> was administered at four doses to derive dose–effect curves. Doses and volumes of drugs are summarized in table 1. Because the doses of 100  $\mu$ g U50,488H or 20  $\mu$ g yohimbine could not be dissolved in 5  $\mu$ l saline, these compounds were dissolved in 10  $\mu$ l saline.

To perform isobolographic analysis, clonidine and morphine were coadministered at a fixed dose ratio (2:1) as shown in table 1. This ratio was selected to be close to the actual ratio (2.7:1) of the ED<sub>50</sub>s for clonidine and morphine when used alone (6.2  $\mu$ g for clonidine and 2.3  $\mu$ g for morphine). Clonidine and DPDPE were coadministered at a fixed dose ratio of 1:2.5 to be close to the actual ratio (1:2.65) of the ED<sub>50</sub>s of clonidine and DPDPE when given alone (6.2  $\mu$ g for clonidine and 16.4 for DPDPE). Clonidine and U50,488H were coadministered as shown in table 1. In this case, the isobolographic analysis was not performed because the 50% maximum possible effect (MPE) for U50,488H could not be acquired even when 100  $\mu$ g (the maximum dose that could be dissolved in 10  $\mu$ l saline) was administered. In addition, the dose–response curve for U50,488H and clonidine were not parallel. Yohimbine (20  $\mu$ g) or naloxone (5  $\mu$ g) was administered in some rats after the testing of clonidine (10  $\mu$ g) or morphine (5  $\mu$ g), respectively. All drug doses are presented as micrograms of the salt. Five rats received 5  $\mu$ l intrathecal vehicle for control trials and

Table 1. Doses and Volumes of Drugs Administered Intrathecally

| Drug          | Dose ( $\mu\text{g}$ ) |     |            |     | Volume ( $\mu\text{l}$ ) | n  |
|---------------|------------------------|-----|------------|-----|--------------------------|----|
| Clonidine (C) | 1                      | 2.5 | 5          | 10  | 5                        | 46 |
| Morphine (M)* | 0.5                    | 1   | 2.5        | 5   | 5                        | 44 |
| DPDPE (D)*    | 2.5                    | 5.0 | 10         | 25  | 5                        | 46 |
| U50,488H (U)* | 5                      | 10  | 50         | 100 | 5                        | 29 |
| C + M         | 0.2 + 0.1              |     | 0.5 + 0.25 |     | 5                        | 18 |
|               | 1 + 0.5                |     | 2 + 1      |     | 5                        | 17 |
| C + D         | 0.4 + 1.0              |     | 1.0 + 2.5  |     | 5                        | 15 |
|               | 2.0 + 5.0              |     | 3.0 + 7.5  |     | 5                        | 14 |
| C + U         | 2.5 + 50               |     | 5 + 50     |     | 5                        | 14 |
|               | 12.5 + 100             |     | 5 + 100    |     | 10                       | 12 |
| Yohimbine     | 20                     |     |            |     | 10                       | 7  |
| Naloxone      | 5                      |     |            |     | 5                        | 6  |

\* From Harada et al.

evaluation of the reliability of the detection balloon technique.

#### Data Analysis and Isobologram Construction

The isobologram displays graphically a pharmacologic characterization of drug-to-drug interaction (supraadditive, additive, or subadditive) on x,y coordinates. It uses equieffective doses of individual and combined drugs. To calculate equieffective doses, all visceromotor thresholds were converted to percentage MPE by the following equation: percentage MPE =  $100 \times (\text{postdrug threshold} - \text{control threshold}) / (80 - \text{control threshold})$ . To construct an isobologram for the dose producing 50% MPE, using a least-squares regression analysis, the 50% MPE dose and its 95% confidence intervals (95% CIs) were calculated. For the combinations of clonidine and morphine and of clonidine and DPDPE, total doses of the combined drugs were used for a least-squares regression analysis. Component doses of clonidine and morphine and of clonidine and DPDPE for 50% MPE were derived from the combination dose ratio used in this study (clonidine:morphine = 2:1 and clonidine:DPDPE = 1:2.5). An isobologram was constructed by plotting the 50% MPE dose with its 95% CIs on the x,y coordinates (x for clonidine and y for morphine or DPDPE). If the experimentally determined isobole (a point representing x,y coordinates for the 50% MPE dose) fell significantly below the theoretically additive isobole, the interaction between clonidine and morphine or DPDPE was to be

defined as supraadditive (synergistic). The theoretical isobole for the purely additive interaction was derived from an additive line and the combination dose ratio. The additive line was drawn by connecting the point indicating the 50% MPE dose on the x-axis (clonidine given alone) with that on the y-axis (morphine or DPDPE given alone). The 95% CIs for the theoretical additive isobole were similarly acquired by connecting the 95% CIs on the x-axis with that on the y-axis. Although the isobologram provides a convenient graphical display, it usually contributes little to the necessary statistical analysis.<sup>23</sup> For the statistical estimation of the difference between the experimental 50% MPE dose and the theoretically additive 50% MPE dose, potency ratio analysis was used, as described in the appendix.

#### Statistics

All values were expressed as the means  $\pm$  SEM. One-way analysis of variance followed by Fisher's least-significant difference test as a *post hoc* test for multiple comparisons was used to compare the effect at different doses or at different times. A paired and unpaired Student's *t* test was used to analyze reversibility by yohimbine or naloxone. Dose-response curves were obtained using a least-squares linear regression analysis. The test for parallelism of dose-response curves and the potency ratio analysis were performed according to a method described previously.<sup>24</sup> *P* values < 0.05 were deemed statistically significant.

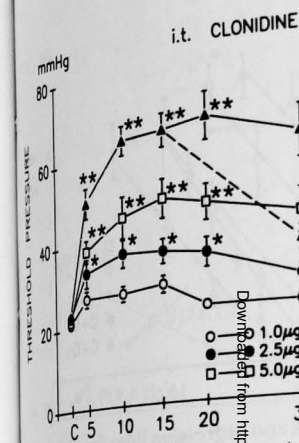

Fig. 1. Time course of visceromotor threshold pressure (mmHg) at four doses of intrathecal clonidine at four doses in 10 animals. The mean value and SEM in 10 animals for each dose was approximately 20 mmHg. Clonidine doses in a dose-dependent manner ( $P < 0.05$  and  $P < 0.01$  by analysis of variance) increased the visceromotor threshold pressure. Intrathecal yohimbine (20  $\mu\text{g}$ ) and naloxone (5  $\mu\text{g}$ ) at 18 min after 10  $\mu\text{g}$  clonidine, decreased the visceromotor threshold pressure significantly at 30 and 45 min ( $P < 0.05$ ).

#### Results

##### Reliability of the Detection Balloon Technique

The mean value of all control visceromotor thresholds determined by the detection balloon technique was 20 mmHg, a value comparable to that originally reported by Ness and colleagues<sup>2</sup> or electromyographic detection of visceromotor threshold.<sup>2</sup> In the animals that received intrathecal clonidine, the visceromotor threshold was constant during the 90-min observation period.

##### Effects of Intrathecal Clonidine on Visceromotor Threshold

As shown in figure 1, intrathecal clonidine significantly increased visceromotor threshold pressure in a dose-dependent manner ( $P < 0.05$ ). The increase was observed between 10 and 20 min after administration of clonidine (10  $\mu\text{g}$ ), and was significantly greater at 30 and 45 min after administration with the thresholds in animals receiving 10  $\mu\text{g}$  clonidine at 15, 30, and 45 min. As reported in the accompanying article,<sup>25</sup> morphine increased the visceromotor threshold in a dose-dependent manner, and the increase was approximately 15 min. N

## VISCERAL ANTINOCICEPTIVE EFFECTS OF CLONIDINE

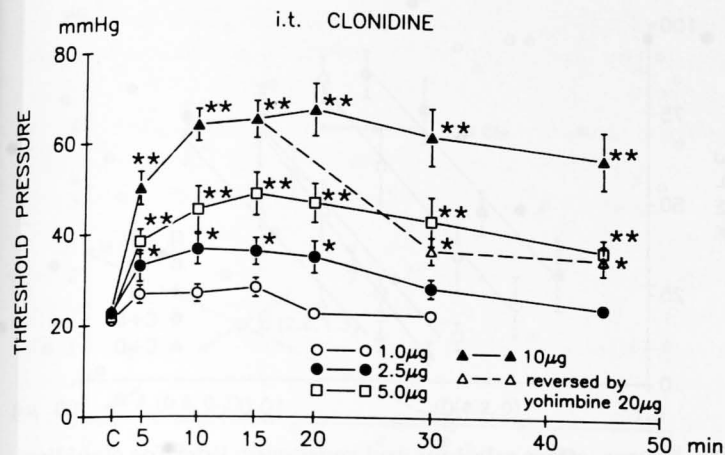

Fig. 1. Time course of visceromotor threshold change after intrathecal clonidine at four doses. Each point and bar represent the mean value and SEM in 10–13 rats. Control threshold for each dose was approximately 22 mmHg. Peak effect time was between 10 and 20 min. Clonidine increased the thresholds in a dose-dependent manner with a significant change ( $P < 0.05$  and  $P < 0.01$  by analysis of variance) at the indicated times. Intrathecal yohimbine (20  $\mu\text{g}$ ,  $n = 7$ ), when administered at 18 min after 10  $\mu\text{g}$  clonidine, decreased the thresholds significantly at 30 and 45 min ( $P < 0.05$ ).

## Results

#### Reliability of the Detection Balloon for Determining Visceromotor Response

The mean value of all control visceromotor thresholds determined by the detection balloon method was 22.0 mmHg, a value comparable to the value (22.4 mmHg) originally reported by Ness and Gebhart using visual or electromyographic detection methods in the awake rat.<sup>2</sup> In the animals that received vehicle alone intrathecally, the visceromotor thresholds remained constant during the 90-min observation period.

#### Effects of Intrathecal Clonidine on the Visceromotor Threshold

As shown in figure 1, intrathecal clonidine significantly increased visceromotor thresholds in a dose-dependent manner ( $P < 0.05$ ). The peak effects were observed between 10 and 20 min. Yohimbine (20  $\mu\text{g}$ ), when administered intrathecally 18 min after administration of clonidine (10  $\mu\text{g}$ ), decreased the thresholds significantly at 30 and 45 min ( $P < 0.05$  compared with the thresholds in animals not treated with yohimbine at 15, 30, and 45 min).

As reported in the accompanying article,<sup>21</sup> intrathecal morphine increased the thresholds significantly ( $P < 0.05$ ) in a dose-dependent manner. Peak effect time was approximately 15 min. Naloxone (5  $\mu\text{g}$ ), when

administered intrathecally 18 min after morphine (5  $\mu\text{g}$ ), decreased the thresholds significantly ( $P < 0.05$ ) at 30 and 45 min. Similarly, DPDPE increased the thresholds significantly ( $P < 0.05$ ) in a dose-dependent manner. The peak effect occurred approximately 15 min after administration.

In contrast to clonidine, morphine, and DPDPE, as reported in the accompanying article,<sup>21</sup> U50,488H increased the thresholds significantly ( $P < 0.05$ ) at only 5 and 10 min after administration of 100  $\mu\text{g}$ , the maximum dose that could be dissolved in 10  $\mu\text{l}$  saline. Other intrathecal doses of U50,488H had no significant effect on the visceromotor threshold at any time.

#### Antinociceptive Interactions after Intrathecal Coadministration of Clonidine and Morphine, Clonidine and DPDPE, or Clonidine and U50,488H

As shown in figure 2, combinations of clonidine and morphine and, in figure 3, clonidine and DPDPE increased the visceromotor thresholds in a dose-dependent manner with less of each drug compared with experiments in which the drugs were used alone. A regression line for the dose-effect relation of combined clonidine and morphine or clonidine and DPDPE at 15 min after administration was shifted leftward from the regression lines for both individual morphine and DPDPE doses at 15 min after administration (fig. 4). Dose-response functions for morphine and DPDPE alone shown in figure 4 and table 2 correspond to the values reported in the accompanying article.<sup>21</sup>

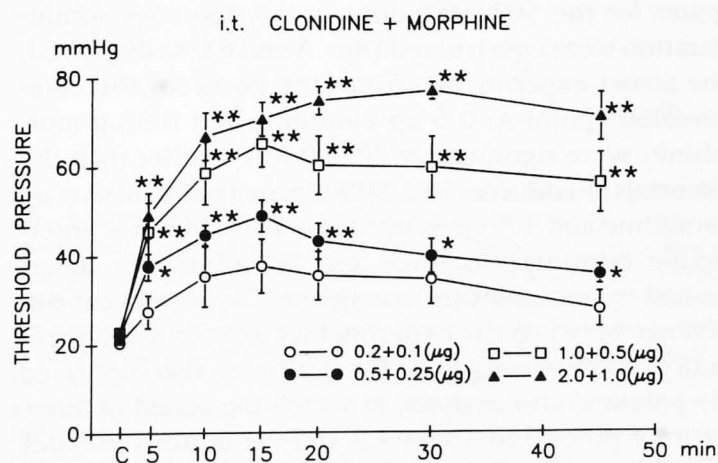

Fig. 2. Time course of visceromotor threshold change after intrathecal coadministration of clonidine and morphine in four combinations. Each point and bar represent the mean value and SEM in eight or nine rats. The ratio of combination doses was kept constant (clonidine:morphine = 2:1). \* $P < 0.05$ ; \*\* $P < 0.01$ .

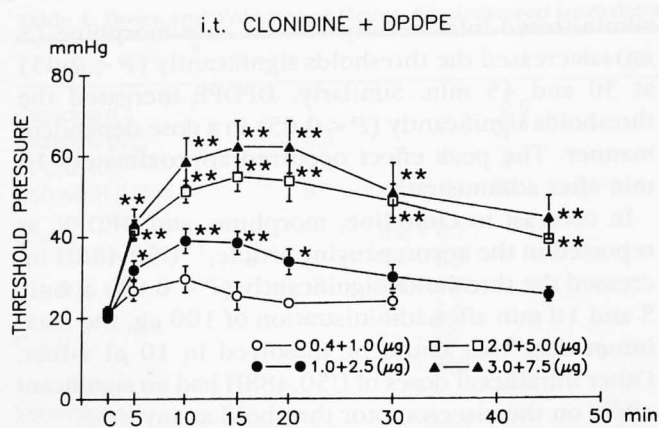

Fig. 3. Time course of visceromotor threshold change after intrathecal coadministration of clonidine and [D-Pen<sup>2</sup>, D-Pen<sup>5</sup>] enkephalin (DPDPE) in four combinations. Each point and bar represent the mean value and SEM in seven or eight rats. The ratio of combination doses was kept constant (clonidine: DPDPE = 1:2.5). \* $P < 0.05$ ; \*\* $P < 0.01$ .

Fifty percent-MPE doses for clonidine, morphine, and DPDPE used alone were 6.2, 2.3, and 16.4  $\mu\text{g}$ , respectively. When drugs were combined, the total dose for 50% MPE was 0.9  $\mu\text{g}$  (0.6  $\mu\text{g}$  clonidine plus 0.3  $\mu\text{g}$  morphine) and 6.8  $\mu\text{g}$  (1.9  $\mu\text{g}$  clonidine plus 4.9  $\mu\text{g}$  DPDPE). These values (micrograms) are summarized in table 2 with nanomoles for 50% MPE and slopes of regression lines.

The leftward shift of the regression line suggested synergistic interactions between clonidine and morphine and between clonidine and DPDPE. To determine the nature of the interaction between drugs, isobolograms for the 50% MPE doses at 15 min after administration were constructed (figs. 5 and 6). As displayed, the actual experimental 50% MPE doses for the combination (point A: 0.6  $\mu\text{g}$  clonidine and 0.3  $\mu\text{g}$  morphine) were significantly ( $P < 0.05$ ) smaller than the theoretical additive 50% MPE doses (point B: 2.6  $\mu\text{g}$  clonidine and 1.3  $\mu\text{g}$  morphine). Therefore, the interaction between clonidine and morphine was determined to be significant synergism. The significant difference between the experimental isobole A and theoretical additive isobole B ( $P < 0.05$ ) was also confirmed by potency ratio analysis, in which the actual potency ratio of point B to A was 4.3 and the fiducial potency ratio of point B to A was 1.6. Thus, the difference between isobole A and B was determined again to be statistically significant (appendix). Likewise the interaction between DPDPE and clonidine was found to be synergistic (fig. 6).

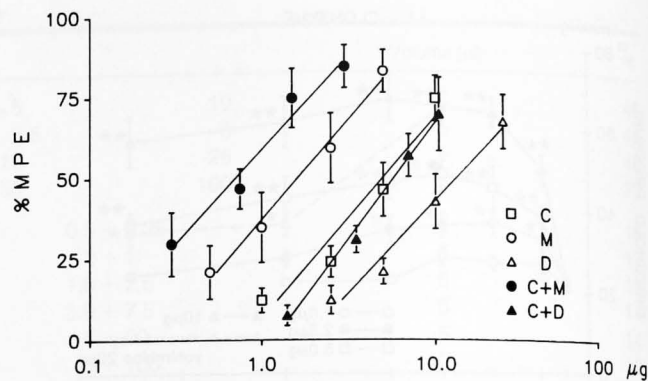

Fig. 4. Dose-effect relations and regression lines for clonidine, morphine, [D-Pen<sup>2</sup>, D-Pen<sup>5</sup>] enkephalin (DPDPE), clonidine plus morphine, and clonidine plus DPDPE 15 min after administration (deemed as the peak effect times for drugs used alone). Each point and bar represent the mean value and SEM. Doses are plotted in log scale; for combinations, combined total doses are plotted on the x-axis. By least-squares regression analysis, doses for 50% maximum possible effect were calculated as follows: 6.2  $\mu\text{g}$  for clonidine alone, 2.3  $\mu\text{g}$  for morphine alone, 16.4 for DPDPE alone, 0.9  $\mu\text{g}$  (0.6  $\mu\text{g}$  clonidine plus 0.3  $\mu\text{g}$  morphine) for the clonidine-morphine combination, and 6.8  $\mu\text{g}$  (1.9 clonidine plus 4.9 DPDPE) for the clonidine-DPDPE combination.

A dose-effect regression line for U50,488H at 10 min after administration was not parallel with that for clonidine at 10 min after administration. U50,488H produced a less intense and shorter effect compared with that of clonidine. Therefore, a thorough isobolographic analysis was not conducted to evaluate the interaction

Table 2. Summary of 50% MPE Dose Values ( $\mu\text{g}$  or nm) and Slope Values of Regression Lines in figure 6

| Drug       | $\mu\text{g}$ (95% CI) | nm (95% CI)      | Slope |
|------------|------------------------|------------------|-------|
| C          | 6.2 (5.3-7.4)          | 23.3 (19.9-27.8) | 62.9  |
| M          | 2.3 (1.6-3.2)          | 3.0 (2.1-4.2)    | 60.4  |
| D          | 16.4 (13.2-21.5)       | 25.4 (20.4-33.3) | 56.5  |
| C + M      | 0.9 (0.6-1.4)          | 2.7 (1.8-4.1)    | 58.7  |
| C in C + M | 0.6 (0.4-0.9)          | 2.3 (1.5-3.4)    |       |
| M in C + M | 0.3 (0.2-0.5)          | 0.4 (0.3-0.7)    |       |
| C + D      | 6.8 (5.8-8.2)          | 14.7 (12.3-17.7) | 50.3  |
| C in C + D | 1.9 (1.6-2.3)          | 7.1 (6.0-8.6)    |       |
| D in C + D | 4.9 (4.1-5.9)          | 7.6 (6.3-9.1)    |       |

Values of clonidine (C), morphine (M), and clonidine (C) and DPDPE (D) and their combinations (C + M) were calculated from the data at 15 min after drug administration. From the values of nanomoles (nm) for 50% MPE, the rank order of potencies of individual drugs was morphine  $\gg$  clonidine  $>$  DPDPE. When clonidine and morphine or clonidine and DPDPE were combined, nanomoles for the 50% MPE of each component were remarkably decreased from that of the respective drug used alone. Slopes of regression lines for C, M, D, C + M, and C + M were not significantly different.

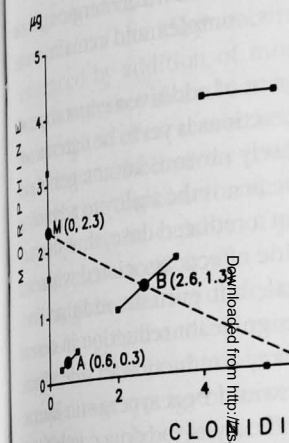

Fig. 5. Isobologram for dose provided effect (MPE) with 95% confidence interval at the time of peak effect (15 min) in combinations. The x, y coordinates represent doses of clonidine and morphine, respectively. Isobole A and M represent 50% MPE dose of clonidine and morphine used alone, respectively. Isobole B represents the experimental 50% MPE doses (0.6  $\mu\text{g}$  clonidine plus 0.3  $\mu\text{g}$  morphine). Isobole B represents the theoretical additive 50% MPE doses of clonidine and morphine (2.6  $\mu\text{g}$  clonidine plus 1.3  $\mu\text{g}$  morphine). If their interaction were additive, it would have required 2.6  $\mu\text{g}$  clonidine plus 1.3  $\mu\text{g}$  morphine to produce the 50% MPE. As displayed, the experimental isobole A is significantly smaller than the theoretical additive isobole B. This finding indicates synergism between clonidine and morphine.

between clonidine and U50,488H (or predict) whether a synergism existed between clonidine and U50,488H. A moderately effective dose of clonidine was combined with a subeffective dose of U50,488H (50 of 100  $\mu\text{g}$ ). Seven combinations of clonidine and U50,488H were tested and none showed no significant synergism compared with clonidine used alone. Thus, synergism between spinal clonidine and U50,488H in visceral antinociception.

## Discussion

**Visceral Antinociceptive Effect of Clonidine, Morphine, and U50,488H**  
The current study demonstrated that administered clonidine produced effects on visceral nociception that intrathecal yohimbine reversal results are consistent with the findings

## VISCERAL ANTINOCICEPTIVE EFFECTS OF CLONIDINE

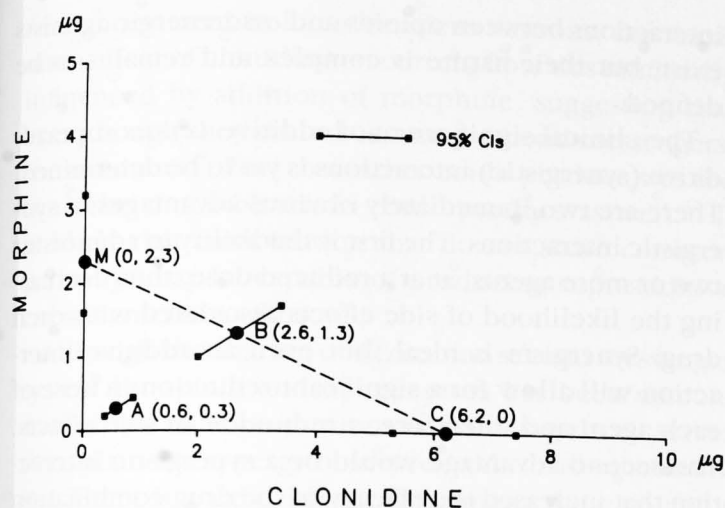

Fig. 5. Isobologram for dose providing 50% maximum possible effect (MPE) with 95% confidence intervals (CIs) (arrows) at the time of peak effect (15 min) in clonidine-morphine combinations. The x,y coordinates represent equieffective pairs of doses of clonidine and morphine, respectively. Isoboles C and M represent 50% MPE dose of clonidine and morphine used alone, respectively. Isobole A represents the actual experimental 50% MPE doses (0.6  $\mu$ g for clonidine and 0.3  $\mu$ g for morphine). Isobole B represents the theoretical additive 50% MPE doses of clonidine and morphine (2.6  $\mu$ g for clonidine, 1.3  $\mu$ g for morphine). If their interaction was purely additive, it would have required 2.6  $\mu$ g clonidine plus 1.3  $\mu$ g morphine to produce the 50% MPE. As displayed, isobole A fell below isobole B; in addition, 95% CIs of the two isoboles did not overlap each other. This finding indicates significant synergism between clonidine and morphine ( $P < 0.05$ ).

between clonidine and U50,488H. Instead, to estimate (or predict) whether a synergistic-like interaction existed between clonidine and U50,488H, a mildly or moderately effective dose of clonidine (2.5 or 5  $\mu$ g) was combined with a subeffective or mildly effective dose of U50,488H (50 or 100  $\mu$ g). As shown in figure 7, combinations of clonidine and U50,488H at all doses tested showed no significant difference in effects as compared with clonidine used alone, indicating no synergism between spinal clonidine and U50,488H for visceral antinociception.

## Discussion

### Visceral Antinociceptive Effects of Spinal Clonidine, Morphine, and U50,488H

The current study demonstrated that intrathecally administered clonidine produced potent antinociceptive effects on visceral nociception induced by CRD and that intrathecal yohimbine reversed the effects. The results are consistent with the findings of Ness and Geb-

hart,<sup>2,6</sup> Danzebrink and Gebhart,<sup>7</sup> and Mares and Gebhart<sup>9</sup> that clonidine inhibits the behavioral and dorsal horn neuronal nociceptive responses to CRD at the spinal level. These results suggest that spinal  $\alpha_2$ -adrenergic receptor systems are involved in visceral as well as somatic antinociception.

### Synergism of Antinociceptive Interactions Between Clonidine and Morphine for Visceral Nociception

This study demonstrated a significant synergism between spinal clonidine and morphine and DPDPE for visceral antinociception. Although these results suggest a potential clinical significance of the combined spinal administration of  $\alpha_2$ -adrenergic and  $\mu$ - or  $\delta$ -opioid agonists in visceral pain control and other animal studies have demonstrated supraadditive (synergistic) interactions between spinally administered clonidine and opioids,<sup>19,25,26</sup> we must exercise caution in assuming that synergism would be seen in humans. A recent clinical study<sup>27</sup> by Eisenach and colleagues in which iso-

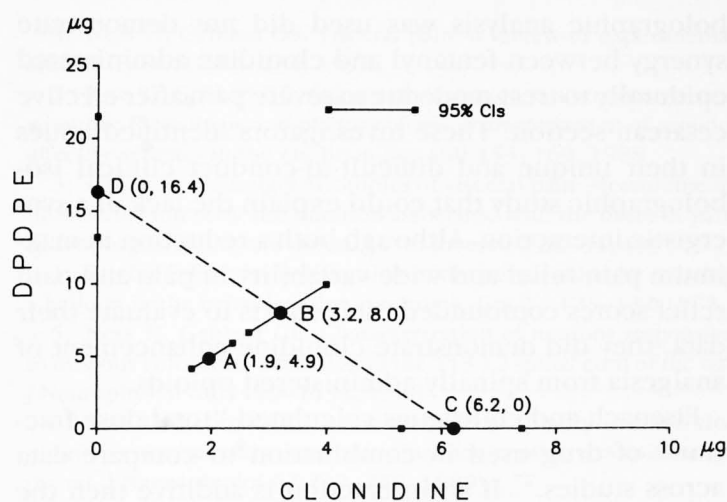

Fig. 6. Isobologram for dose providing 50% maximum possible effect (MPE) with 95% confidence intervals (CIs) (arrows) at the time of peak effect (15 min) in clonidine-[D-Pen<sup>2</sup>, D-Pen<sup>5</sup>] enkephalin (DPDPE) combinations. The x,y coordinates represent equieffective pairs of doses of clonidine and DPDPE, respectively. DPDPE used alone, respectively. Isoboles C and D represent 50% MPE dose of clonidine. Isobole A represents the actual experimental 50% MPE doses (0.6  $\mu$ g for clonidine and 0.3  $\mu$ g for morphine). See also the legend to figure 7. Isobole B represents the theoretical additive 50% MPE doses of clonidine and DPDPE (3.2  $\mu$ g for clonidine and 8.0  $\mu$ g for DPDPE). If their interaction were purely additive, it would have required 3.2  $\mu$ g clonidine plus 8.0  $\mu$ g DPDPE to produce the 50% MPE. As displayed, isobole A fell below isobole B; in addition, 95% CIs of the two isoboles did not overlap each other. This finding indicates significant synergism between clonidine and DPDPE ( $P < 0.05$ ).

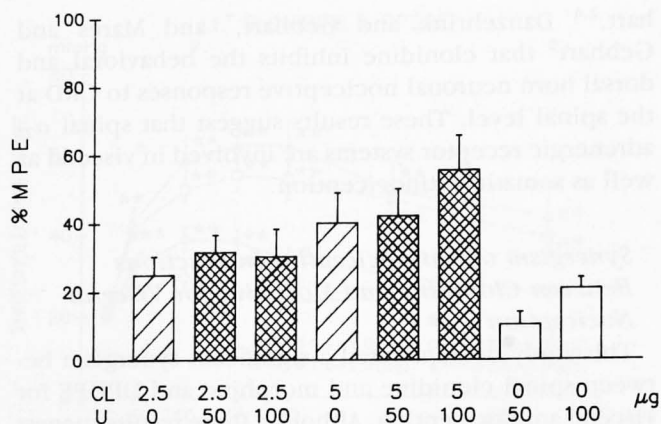

Fig. 7. Histogram of percentage maximum possible effect (MPE) for clonidine alone (diagonal line), clonidine plus U50,488H (cross-hatched line), and U50,488H alone (open box) 10 min after intrathecal administration. Each dose shown below the x-axis was administered in five to eight rats. By analysis of variance, combinations of clonidine and U50,488H at all doses tested showed no significant difference in effects as compared with the corresponding clonidine doses used alone (e.g., 5 μg clonidine + 50 μg U50,488H, 5 μg clonidine + 100 μg U50,488H, or 5 μg clonidine alone). CL = clonidine; U = U50,488H.

bolographic analysis was used did not demonstrate synergy between fentanyl and clonidine administered epidurally to treat moderate to severe pain after elective cesarean section. These investigators identified issues in their unique and difficult-to-conduct clinical isobolographic study that could explain the lack of a synergistic interaction. Although both a reduction in maximum pain relief and wide variability in pain and pain relief scores confounded their efforts to evaluate their data, they did demonstrate clonidine enhancement of analgesia from spinally administered opioids.

Eisenach and colleagues calculated "total dose fraction" of drug used in combination to compare data across studies.<sup>27</sup> If an interaction is additive then the total dose function would be 1 (e.g., if the ED<sub>50</sub> values of two drugs was determined and the combination of 0.25 of the ED<sub>50</sub> of A and 0.75 of the ED<sub>50</sub> of B produced 50% effect). If the dose function is less than 1, we can assume a synergistic interaction. In this study, the total dose fraction for clonidine and morphine was 0.22. For clonidine and DPDPE, it was 0.60. The morphine values compare favorably with numbers calculated by Ossipov *et al.* for data in mice<sup>25</sup> when clonidine was combined with opiates: morphine (0.04), meperidine (0.15), or fentanyl (0.05). The clonidine DPDPE value is closer to that in humans, where epidural clonidine and fentanyl produced a value of 0.52.<sup>27</sup> Important

interactions between opioids and  $\alpha$  adrenergic agonists exist, but their nature is complex and remains to be defined.

The clinical significance of additive *versus* supraadditive (synergistic) interactions is yet to be determined. There are two immediately obvious advantages of synergistic interactions. The first is the ability to administer two or more agents, at a reduced dose, thus decreasing the likelihood of side effects associated with each drug. Synergism is ideal, but even an additive interaction will allow for a significant reduction in dose of each agent and, therefore, a reduction in side effects. The second advantage would be a synergistic interaction that increased the efficacy of the drug combination beyond that of the most efficacious drug in the combination. Because drugs capable of producing complete analgesia by the spinal route of administration were used in this study, we are unable to comment on altered efficacy except to state that the poor efficacy of U50,488H was not altered by clonidine. A greater appreciation of mechanisms of action by which synergistic interactions occur may help to identify possible combinations that do increase efficacy beyond that of the most efficacious agent in use.

The mechanisms by which clonidine and an opioid may synergistically interact are many. At the receptor level positive cooperative binding at either receptor could produce the observed effect. We are unaware of evidence for such an interaction.

In 1979 Sabol and Nirenberg<sup>28</sup> suggested that  $\alpha$  receptors and opioid receptors may be functionally coupled to the same intracellular second messenger systems. As reviewed by Aghajanian and Wang,<sup>29</sup> it is now well established that  $\alpha_2$  and opiate agonists act through shared postreceptor effective mechanisms. It appears that in some neuronal cell types  $\alpha_2$  and opiate receptors have common actions mediated through inhibiting adenylate cyclase, an inhibitory guanosine triphosphate binding protein. Stimulation of either receptor type causes locus ceruleus neurons to be hyperpolarized by the opening of a common set of potassium channels. The clonidine action is likely to be produced by  $\alpha_2$  rather than imidazole receptor interaction because in the rat and bovine adrenal cells a separate second messenger system was activated by clonidine but only imidazole receptors were present. If the synergistic interaction of clonidine and an opioid is attributable to their sharing of a common second messenger system, it is unlikely that the combination would enhance efficacy beyond that for the drug with the highest efficacy.

As demonstrated in locus ceruleus, the maximum effect of clonidine on current is influenced by addition of morphine, even though they shared common mechanisms. The maximum effect that either drug alone could produce is limited by a combination of factors. It is likely that combination of the two pathways may be capable of producing an enhancement in efficacy.

Although the sharing of a common system by opioid and  $\alpha$  receptors is demonstrated, we must be cautious in attempting to explain the synergy observed. There is good evidence that the subtypes there is the opportunity for intracellular responses by multiple pathways. In the current study, the synergy may have occurred because of clonidine activating other pain inhibitory pathways.

Synergistic interactions between analgesic drugs including lidocaine have been demonstrated. Clinically, this is important because it allows a reduction in the dose of each agent and, thus, at least a theoretical reduction in the probability of side effects associated with each agent. An understanding of the mechanisms responsible for such interactions is of academic interest. As demonstrated in our studies, although clonidine and morphine in some neurons a common second messenger system rendered tolerant to the inhibitory effects of clonidine. Our studies in animals demonstrated the potential value of providing analgesic rescue for a patient with analgesia. As we continue to explore analgesic drug combinations, we must have a better understanding of mechanisms.

#### Appendix: Potency Ratio

Significance of the difference between the 50% MPE dose and theoretical value determined using potency ratio. The experimental isobole with the theoretical isobole is defined as the ratio for each isobole (50% MPE dose, where the theoretical or theoretical value) was defined as the smaller as 50% MPE<sub>2</sub>. The difference between the two isoboles can be

## VISCERAL ANTINOCICEPTIVE EFFECTS OF CLONIDINE

As demonstrated in locus ceruleus neurons, the maximum effect of clonidine on current flow was minimally influenced by addition of morphine, suggesting that even though they shared common second messengers, the maximum effect that either could produce was the limit that a combination could produce as well.<sup>30</sup> It is likely that combinations that do not share common pathways may be capable of producing supraadditive enhancement in efficacy.

Although the sharing of a common second messenger system by opioid and  $\alpha_2$  receptors has been demonstrated, we must be cautious in assuming that it serves to explain the synergy observed in this and other studies. There is good evidence that among the  $\alpha$  receptor subtypes there is the opportunity to activate unique intracellular responses by multiple signal transduction pathways. In the current study, the synergistic effect may have occurred because of a systemic effect of clonidine activating other pain inhibitory systems.

Synergistic interactions between opioids and several analgesic drugs including lidocaine<sup>31</sup> and ketorolac<sup>32</sup> have been demonstrated. Clinically, this synergism is important because it allows a reduction in the amount of each agent and, thus, at least theoretically, reduces the probability of side effects associated with each agent. An understanding of the mechanism of action responsible for such interactions is of more than just academic interest. As demonstrated in opioid tolerance studies, although clonidine and morphine may share in some neurons a common second messenger system, rats rendered tolerant to opiates still respond to inhibitory effects of clonidine. Coombs *et al.*,<sup>33</sup> following experimentation in animals by Yaksh and Reddy,<sup>34</sup> demonstrated the potential value of this finding in providing analgesic rescue for a patient tolerant to opiate analgesia. As we continue to search for improved analgesic drug combinations, we will benefit from a better understanding of mechanisms responsible for them.

### Appendix: Potency Ratio Analysis

Significance of the difference between the experimental 50% MPE dose and theoretical additive 50% MPE dose was determined using potency ratio (PR) analysis.<sup>31</sup> The PR for the experimental isobole with the theoretical isobole is defined as the ratio for each isobole. Namely,  $PR = 50\% MPE_1 \text{ dose} / 50\% MPE_2 \text{ dose}$ , where the larger value of the two (experimental or theoretical value) was assigned as the 50% MPE<sub>1</sub> and the smaller as 50% MPE<sub>2</sub>. The significance of difference between the two isoboles can be determined by the relation

of PR and its fiducial PR (FPR). If PR is greater than FPR, the two isoboles (50% MPE values) are deemed to be significantly different from each other ( $P < 0.05$ ). If PR is smaller than FPR, it means no significant difference between the two isoboles. The FPR was obtained from the nomogram<sup>24</sup> using F50% MPE<sub>1</sub> and F50% MPE<sub>2</sub>, where F50% MPE = the fiducial limits of the 50% MPE value. The F50% MPE values were calculated from the following equations:  $50\% MPE \times F50\% MPE = \text{upper } 95\% \text{ CI}$ , and  $50\% MPE / F50\% MPE = \text{lower } 95\% \text{ CI}$ . Using the PR and FPR, the interaction between clonidine and morphine was determined. When PR was larger than FPR, if the experimental isobole was below and to the left side of the theoretical additive isobole, the interaction was termed supraadditive or synergistic. If the experimental isobole was above and to the right side of the additive isobole, the interaction was termed subadditive or antagonistic. If the PR was less than FPR, the interaction was termed additive. As an example, the clonidine and morphine integration, in this study, PR was calculated as 4.3 and FPR was calculated as 1.6. Thus the interaction between clonidine and morphine was significantly ( $P < 0.05$ ) determined as synergism.

### References

1. Ness TJ, Gebhart GF: Visceral pain: A review of experimental studies. *Pain* 41:167-234, 1990
2. Ness TJ, Gebhart GF: Colorectal distension as a noxious visceral stimulus: Physiologic and pharmacologic characterization of pseudo-affective reflexes in the rat. *Brain Res* 450:153-169, 1988
3. Lipkin M, Sleisenger M: Studies of visceral pain: Measurements of stimulus intensity and duration associated with the onset of pain in esophagus, ileum and colon. *J Clin Invest* 37:28-34, 1957
4. Ritchie J: Pain from distension of the pelvic colon by inflating a balloon in the irritable colon syndrome. *Gut* 14:125-132, 1973
5. Ness TJ, Gebhart GF: Characterization of neurons responsive to noxious colorectal distension in the T13-L2 spinal cord of the rat. *J Neurophysiol* 60:1419-1438, 1988
6. Ness TJ, Gebhart GF: Differential effects of morphine and clonidine on visceral and cutaneous spinal nociceptive transmission in the rat. *J Neurophysiol* 62:220-230, 1989
7. Danzebrink RM, Gebhart GF: Antinociceptive effects of intrathecal adrenoceptor agonists in a rat model of visceral nociception. *J Pharmacol Exp Ther* 253:698-705, 1990
8. Iwasaki H, Collins JG, Saito Y, Uchida H, Kerman-Hinds A: Low-dose clonidine enhances pregnancy-induced analgesia to visceral but not somatic stimuli in rats. *Anesth Analg* 72:325-329, 1991
9. Mares TJ, Gebhart GF: Antinociceptive synergy between intrathecal morphine and lidocaine during visceral and somatic nociception in the rat. *ANESTHESIOLOGY* 76:91-99, 1992
10. Yaksh TL, Reddy SVR: Studies in the primate on the analgesic effects associated with intrathecal actions of opiate, alpha adrenergic agonists, and baclofen. *ANESTHESIOLOGY* 54:451-467, 1981
11. Hylden JLK, Wilcox GL: Pharmacological characterization of substance P-induced nociception in mice: Modulation by opioid and noradrenergic agonists at the spinal level. *J Pharmacol Exp Ther* 226:398-404, 1983



12. Wilcox GL, Carlsson KH, Jochim A, Jurna I: Mutual potentiation of antinociceptive effects of morphine and clonidine on motor and sensory responses in rat spinal cord. *Brain Res* 405:84-93, 1987
13. Loomis CW, Milne B, Cervenko FW: A study of the interaction between clonidine and morphine on analgesia and blood pressure during continuous intrathecal infusion in the rat. *Neuropharmacology* 27:191-199, 1988
14. Ossipov MH, Squarez LJ, Spaulding TC: Antinociceptive interaction between alpha-2-adrenergic and opiate agonists at the spinal level in rodents. *Anesth Analg* 68:194-200, 1989
15. Murata K, Nakagawa I, Kumeta Y, Kitahata LM, Collins JG: Intra thecal clonidine suppresses noxiously evoked activity of spinal wide dynamic range neurons in cats. *Anesth Analg* 69:185-191, 1989
16. Omote K, Kitahata LM, Collins JG, Nakatani K, Nakagawa I: Interaction between opiate subtype and  $\alpha_2$ -adrenergic agonists in suppression of noxiously evoked activity of WDR neurons in the spinal dorsal horn. *ANESTHESIOLOGY* 74:737-743, 1991
17. Roerig SC, Fujimoto JM: Multiplicative interaction between intrathecally and cerebroventrically administered mu opioid agonists but limited interactions between delta and kappa agonists for antinociception in mice. *J Pharmacol Exp Ther* 249:762-768, 1989
18. Monasky MS, Zinsmeister AR, Stevens CW, Yaksh TL: Interaction of intrathecal morphine and ST-91 on antinociception in the rat: Dose-response analysis, antagonism and clearance. *J Pharmacol Exp Ther* 254:383-392, 1990
19. Ossipov MH, Harris S, Lloyd P, Messineo E, Lin BS, Bagley J: Antinociceptive interaction between opioids and medetomidine: Systemic additivity and spinal synergy. *ANESTHESIOLOGY* 73:1227-1235, 1990
20. Kitahata LM: Spinal analgesia with morphine and clonidine (editorial). *Anesth Analg* 68: 191-193, 1989
21. Harada Y, Nishioka K, Kitahata LM, Nakatani K, Collins JG: Contrasting actions of intrathecal U50,488H, morphine, or [D-Pen<sup>2</sup>, D-Pen<sup>3</sup>] enkephalin or intravenous U50,488H on the visceromotor response to colorectal distension in the rat. *ANESTHESIOLOGY* 83:336-343, 1995
22. Yaksh TL, Rudy TA: Chronic catheterization of the spinal subarachnoid space. *Physiol Behav* 17:1031-1036, 1976
23. Tallarida RJ, Porreca F, Cowen A: Statistical analysis of drug-drug and site-site interactions with isobolograms. *Life Sci* 45:947-961, 1989
24. Litchfield JT, Wilcoxon F: A simplified method of evaluating dose-effect experiments. *J Pharmacol Exp Ther* 96:99-113, 1949
25. Ossipov MH, Harris S, Lloyd P, Messineo E: An isobolographic analysis of the antinociceptive effect of systemically and intrathecally administered combinations of clonidine and opiates. *J Pharmacol Exp Ther* 255:1107-1116, 1990
26. Roerig SC, Lei S, Kitto K, Hylden JK, Wilcox GL: Spinal interactions between opioid and noradrenergic agonists in mice: Multiplicativity involves delta and alpha-2 receptors. *J Pharmacol Exp Ther* 262:365-374, 1992
27. Eisenach JC, D'Angelo R, Taylor C, Hood DD: An isobolographic study of epidural clonidine and fentanyl after Cesarean section. *Anesth Analg* 79:285-290, 1994
28. Sabol SL, Nirenberg M: Regulation of adenylate cyclase of neuroblastoma X glioma hybrid cells by  $\alpha$ -adrenergic receptors. *J Biol Chem* 254:1913-1920, 1979
29. Aghajanian GK, Wang YK: Common  $\alpha_2$  and opiate effector mechanisms in the locus coeruleus: Intracellular studies in brain slices. *Neuropharmacology* 26:793-799, 1987
30. Andrade RA, Aghajanian GK: Opiate and  $\alpha_2$ -adrenergic-induced hyperpolarizations of locus coeruleus neurons in brain slices: Reversal by cyclic-AMP analogs. *J Neurosci* 5:2359-2364, 1985
31. Maves TJ, Gebhart GF: Antinociceptive synergy between intrathecal morphine and lidocaine during visceral and somatic nociception in the rat. *ANESTHESIOLOGY* 76:91-99, 1992
32. Maves TJ, Pechman PS, Meller, ST, Bebhart CF: Ketorolac potentiates morphine antinociception during visceral nociception in the rat. *ANESTHESIOLOGY* 80:1094-1101, 1994
33. Coombs DW, Saunders RL, Lachana D, Savage S, Ragnarsson TS, Jensen LE: Intrathecal morphine tolerance: Use of intrathecal clonidine, DADLE, and intraventricular morphine. *ANESTHESIOLOGY* 358-363, 1985
34. Yaksh TL, Reddy SVR: Studies in the primate on the analgetic effects associated with intrathecal actions of opiates,  $\alpha$ -adrenergic agonists, and baclofen. *ANESTHESIOLOGY* 54:451-467, 1981

**Background:** Halothane has been shown to be a nicotinic acetylcholine receptor sensitizing effect in laboratory animals. In laboratory animals, the effect of isoproterenol in human patients is to enhance the effect of isoproterenol in human patients. The current study was designed to investigate the mechanism of action of halothane on the interaction of isoproterenol and Gpp(NH)p-stimulated adenylyl cyclase activity, isoproterenol, Gpp(NH)p, and forskolin-activated adenylyl cyclase activity, studied alone and in the presence of manganese-treated membranes. The interaction with inhibitory G-protein and adenosine diphosphate-ribosylation toxin and immunohistochemical techniques were used.

**Results:** Halothane (1%) augmented Gpp(NH)p-stimulated adenylyl cyclase activity, but did not affect on forskolin-stimulated adenylyl cyclase activity. Halothane inhibited the stimulating effect of isoproterenol on adenylyl cyclase activity, but remained unchanged in control membranes. In the presence of pertussis toxin, isoproterenol and Gpp(NH)p on adenylyl cyclase activity were enhanced, but further stimulation by halothane did not influence the membrane. No effect of halothane on adenylyl cyclase activity by pertussis toxin was observed.

**Conclusions:** Halothane stimulates adenylyl cyclase activity by interfering with the effects of the  $\alpha$  subunit of the effector. Decreased membrane phospholipid content in the presence of halothane does not occur and  $\beta$  subunits is not affected by halothane. Halothane does not impair the binding of pertussis toxin to membranes.

(Key words: Anesthetics, Volatile)

\* Staff Cardiologist.

† Associate Professor of Cardiology.

Received from the Klinik III für Innere Medizin, Universität zu Köln, Köln, Germany. Submitted for publication April 10, 1995. Accepted for publication April 10, 1995. Supported by the Deutsche Forschungsgemeinschaft. Dr. Böhm is a member of the Sonderforschungsbereich 224, Hess and Heisenberg programs of the Deutsche Forschungsgemeinschaft.

Address reprint requests to Dr. Böhm, Institut für Pharmakologie, Universität zu Köln, Joseph-Stelzmann-Str. 57, D-50931 Köln, Germany.
